# Supplementary material for: Transcriptional transitions in Alphonso mango (Mangifera indica L.) during fruit development and ripening explain its distinct aroma and shelf life characteristics
Source: PubMed Central journal article supplement (PMC5562913; doi:10.1038/s41598-017-08499-5), 2017-08-18

## **Transcriptional transitions in Alphonso mango (*Mangifera indica* L.) during fruit development and ripening explain distinct aroma and shelf life characteristics**

Ashish B. Deshpande<sup>a</sup>, Krishanpal Anamika<sup>b</sup>, Vineet Jha<sup>b</sup>, Hemangi G. Chidley<sup>a</sup>, Pranjali S. Oak<sup>a</sup>, Narendra Y. Kadoo<sup>a</sup>, Keshav H. Pujari<sup>c</sup>, Ashok P. Giri<sup>a</sup> and Vidya S. Gupta<sup>a,\*</sup>

<sup>a</sup> Plant Molecular Biology Group, Biochemical Sciences Division, CSIR-National Chemical Laboratory, Pune-411008, Maharashtra, India

<sup>b</sup> Labs, Persistent Systems Limited, Pingala-Aryabhata, Erandwane, Pune 411004,

<sup>c</sup> Dr. Balasaheb Sawant Konkan Agriculture University, Dapoli-415712, Maharashtra, India

\*Corresponding Author

Dr. (Mrs.) Vidya S. Gupta  
Plant Molecular Biology Group  
Biochemical Sciences Division  
CSIR-National Chemical Laboratory  
Pune-411008, India  
Phone: +91-20-25902247  
Fax: +91-20-25902648  
E mail: [vs.gupta@ncl.res.in](mailto:vs.gupta@ncl.res.in)

**Supplementary Figure SF1:** Heatmap representing expression profiles of various gene ontologies from biological process (BP), molecular function (MF) and cellular components (CC) in different tissues, (a) Stage wise normalization and (b) global normalization for each GO category presented.

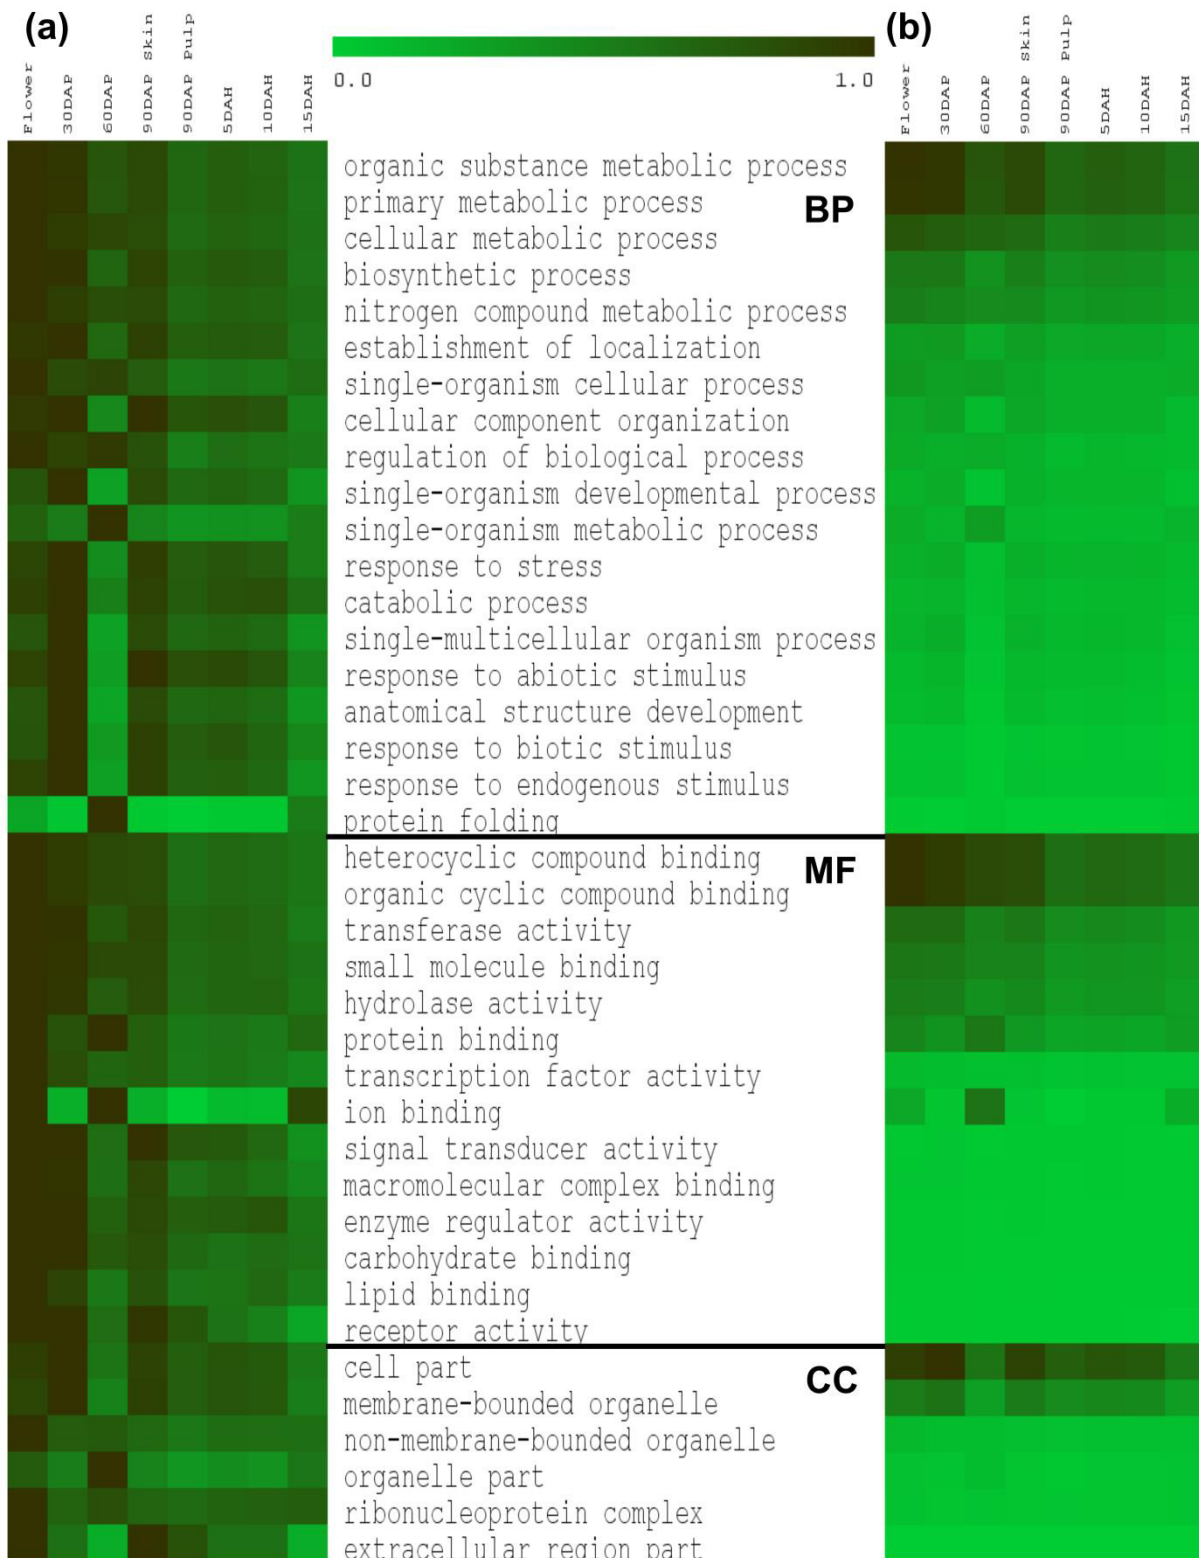

**Supplementary Figure SF2:** Important pathways, such as (a) starch and sucrose metabolism, (b) cysteine and methionine metabolism and ethylene biosynthesis, (c) phenylpropanoid biosynthesis and (d) flavonoid biosynthesis, which are functional in Alphonso mango. Data sourced from the KEGG pathway database (Kanehisa laboratories).

(a)

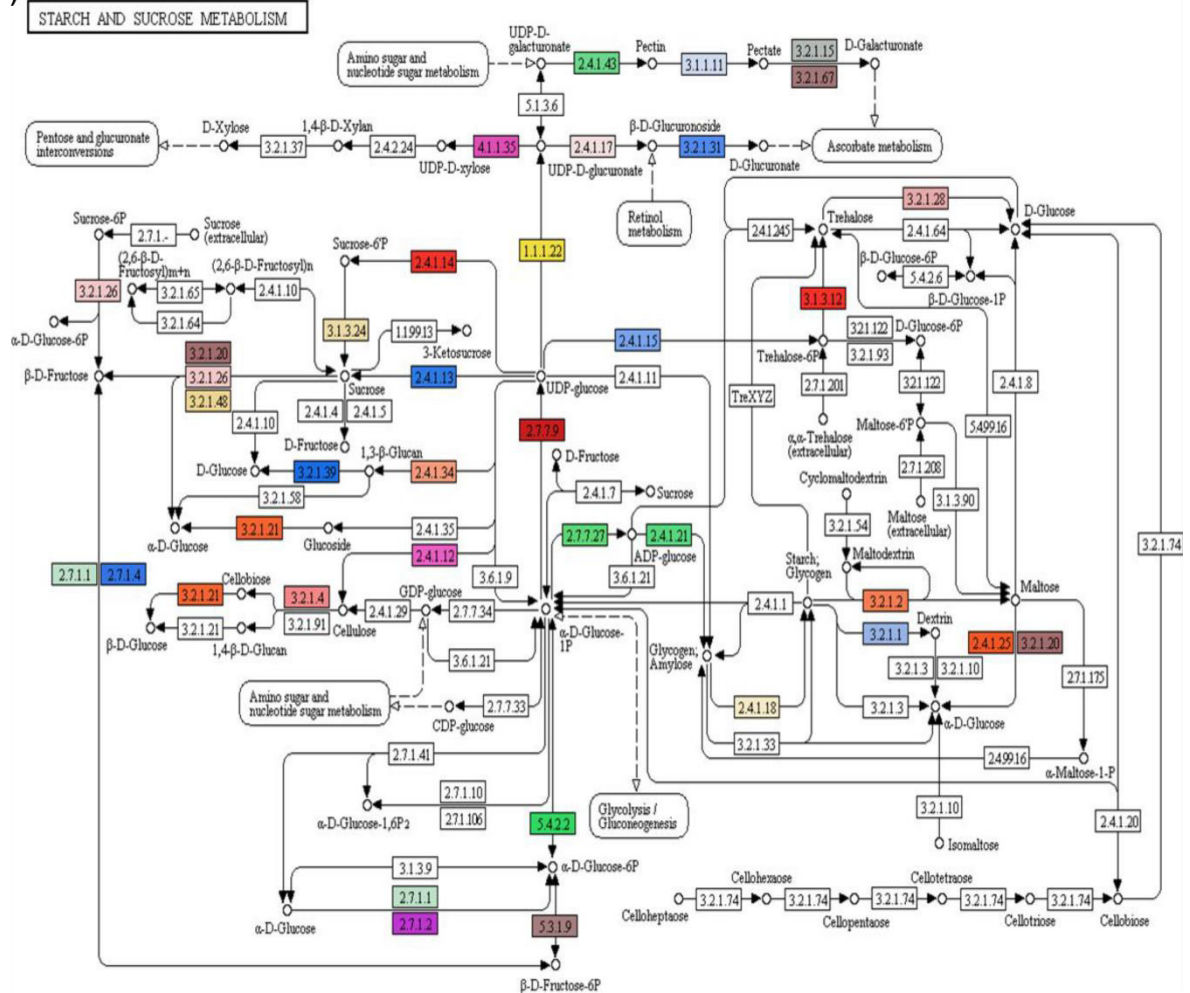

(b)

CYSTEINE AND METHIONINE METABOLISM

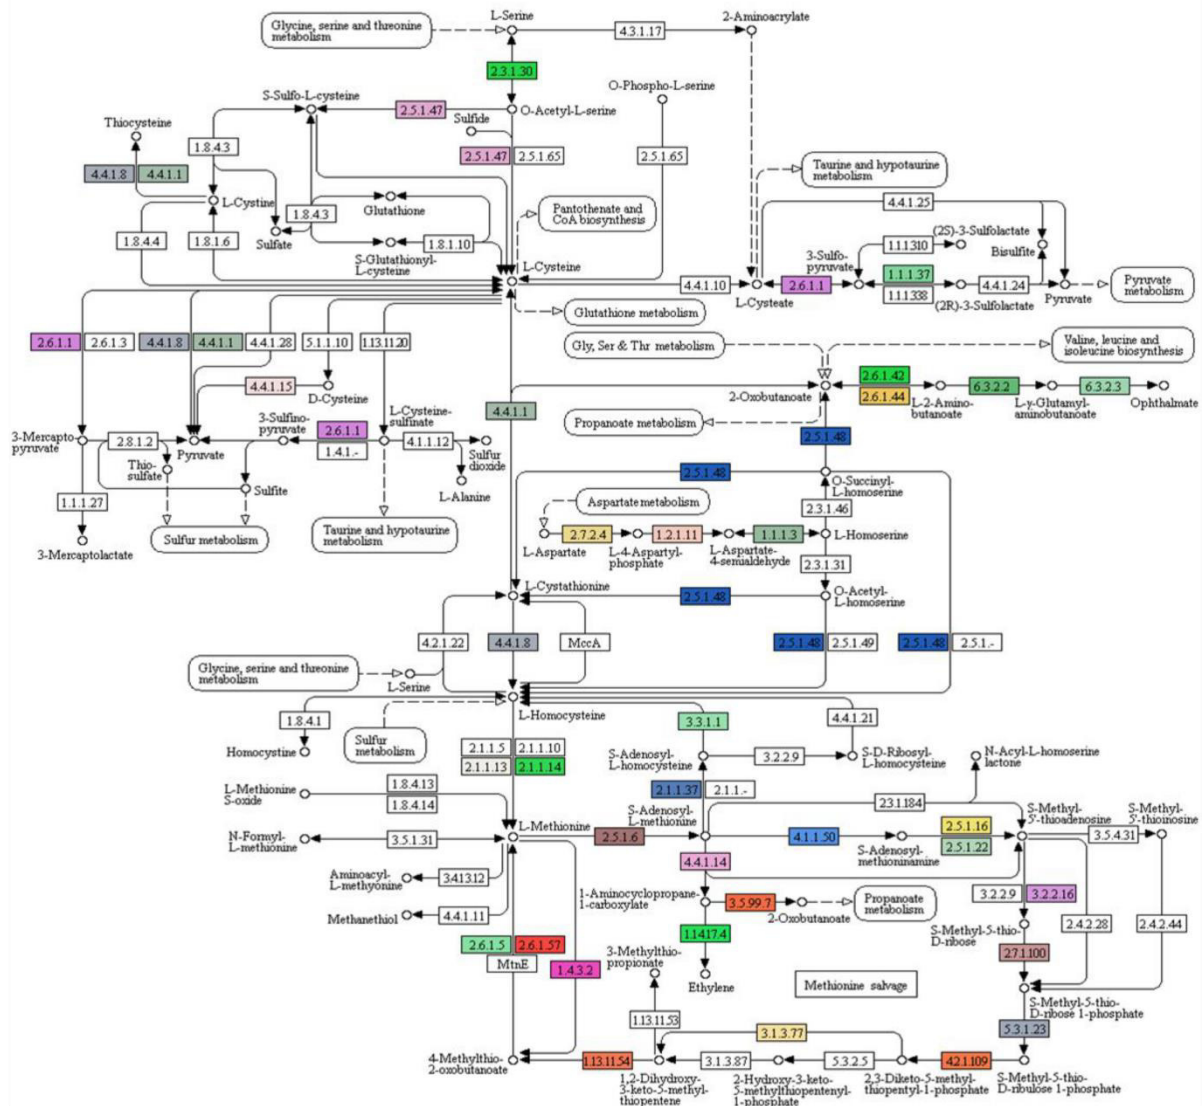

(c)

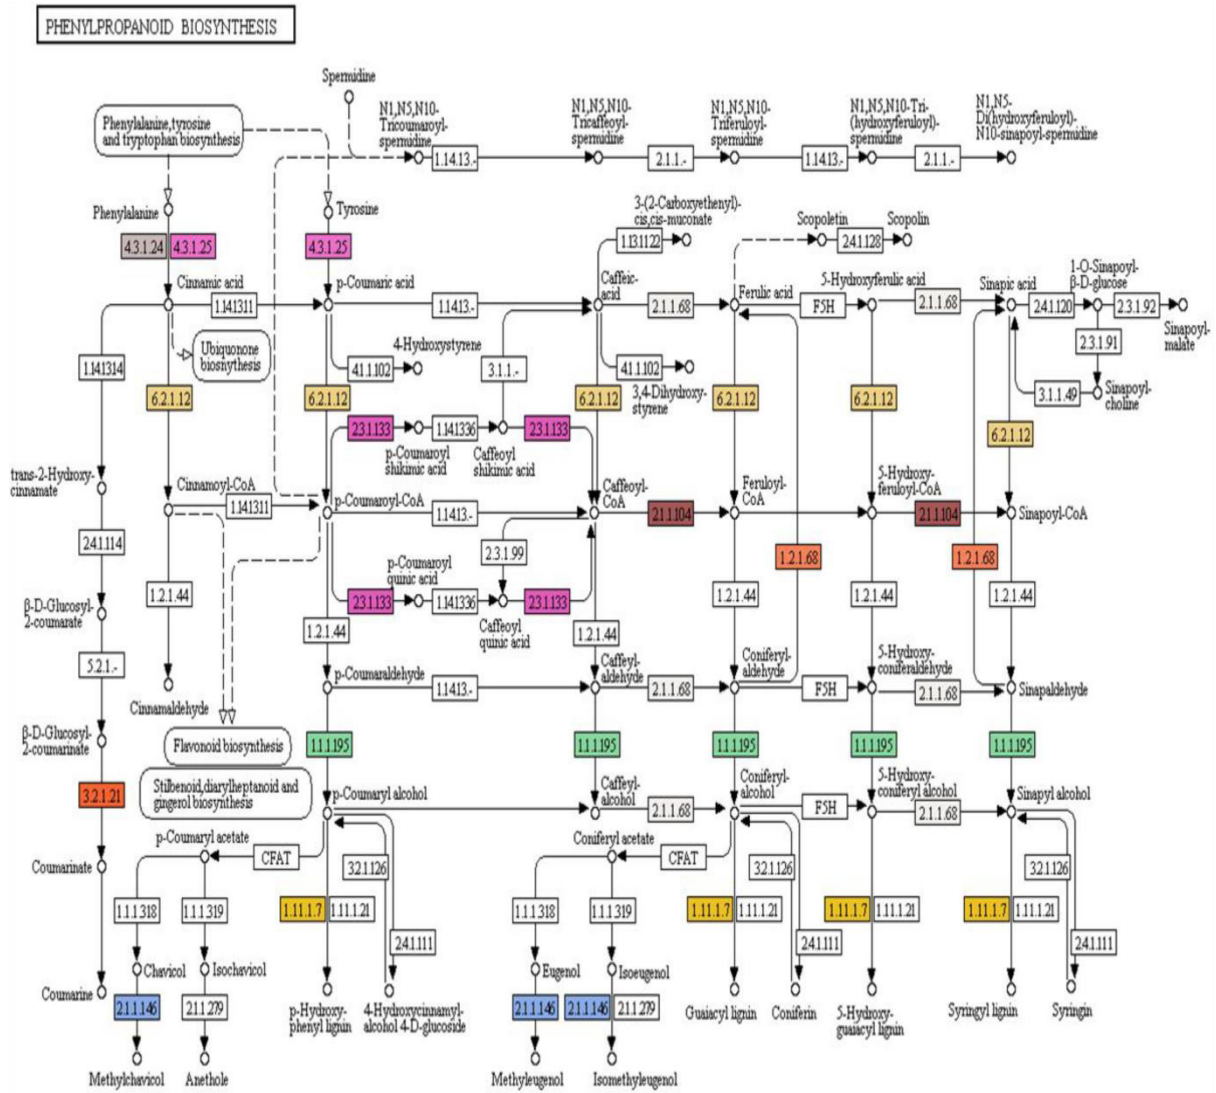





**Supplementary Figure SF3:** Phylogenetic analysis by neighbor-joining of proteins encoded by Enone oxidoreductase (gi|387135418) involved in the biosynthesis of furaneol from *Mangifera indica* (orange color) and other contigs representing quinone oxidoreductases from the present study (blue color) and other characterized oxidoreductases (black color) from *Nicotiana tabacum\_2*-alkenal\_reductase\_(gi|75206691), *Fragaria vesca*\_Enone\_oxidoreductase (gi|613785129), *Solanum lycopersicum\_2*-methylene-furan-3-one\_reductase (gi|823630988), *Fragaria* × *Ananassa*\_ Enone\_Oxidoreductase (gi|480312155) and *Fragaria* × *Ananassa*\_ quinone\_oxidoreductase (gi|29468088)

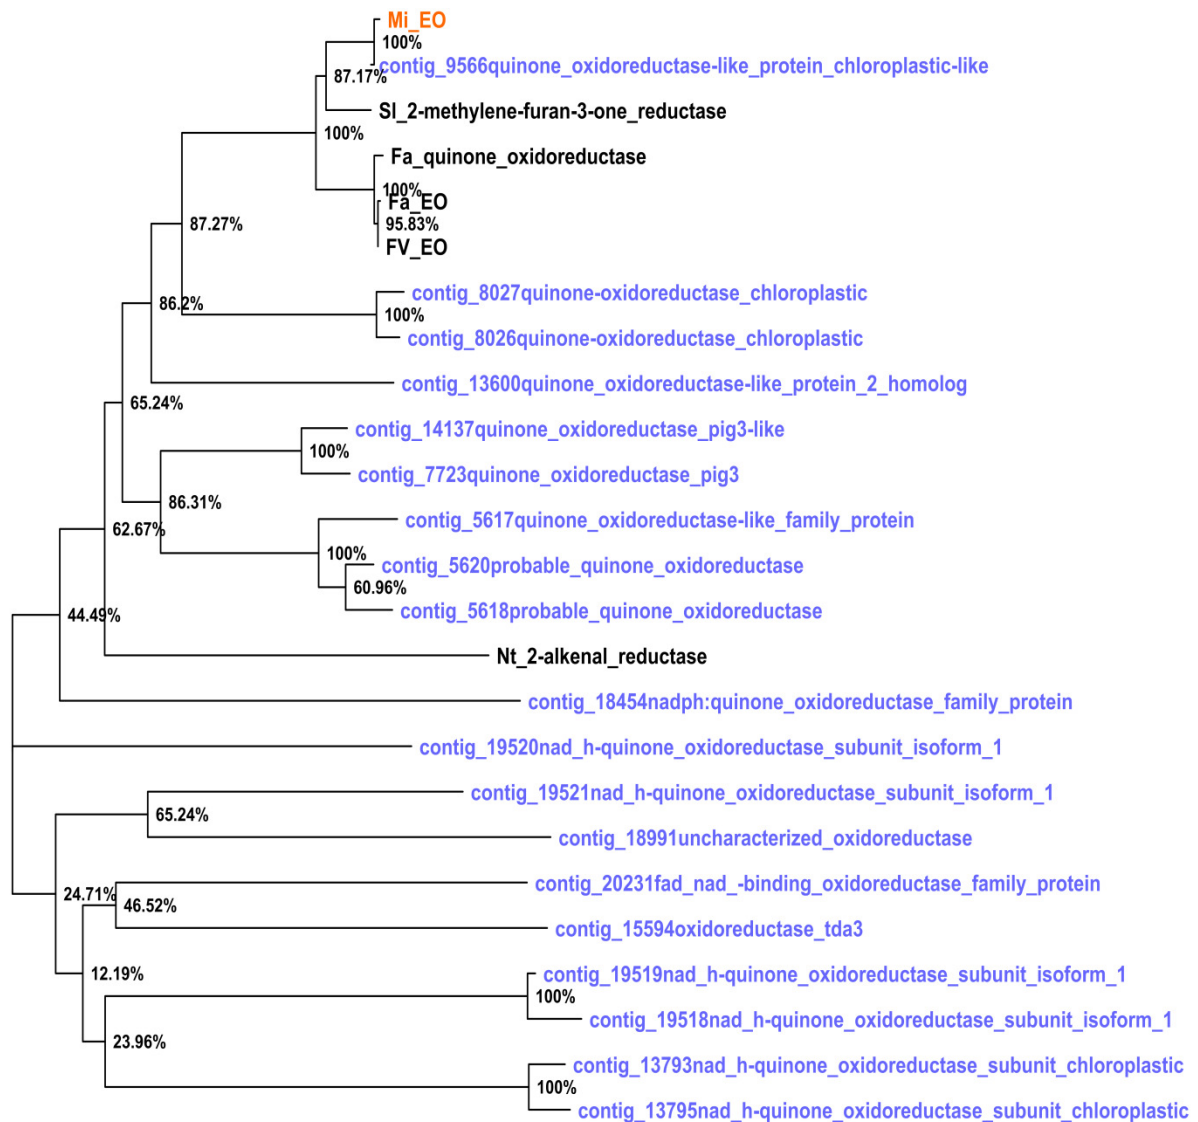

**Supplementary Figure SF4:** Phylogenetic analysis by neighbor-joining of proteins encoded by *O*-methyltransferase (KP993176) involved in the biosynthesis of mesifuran from *Mangifera indica* (orange color) along with the characterized *O*-methyltransferase (black color) from *Fragaria x ananassa* (AAF28353) and other contigs representing *O*-methyltransferase from the present study (blue color).

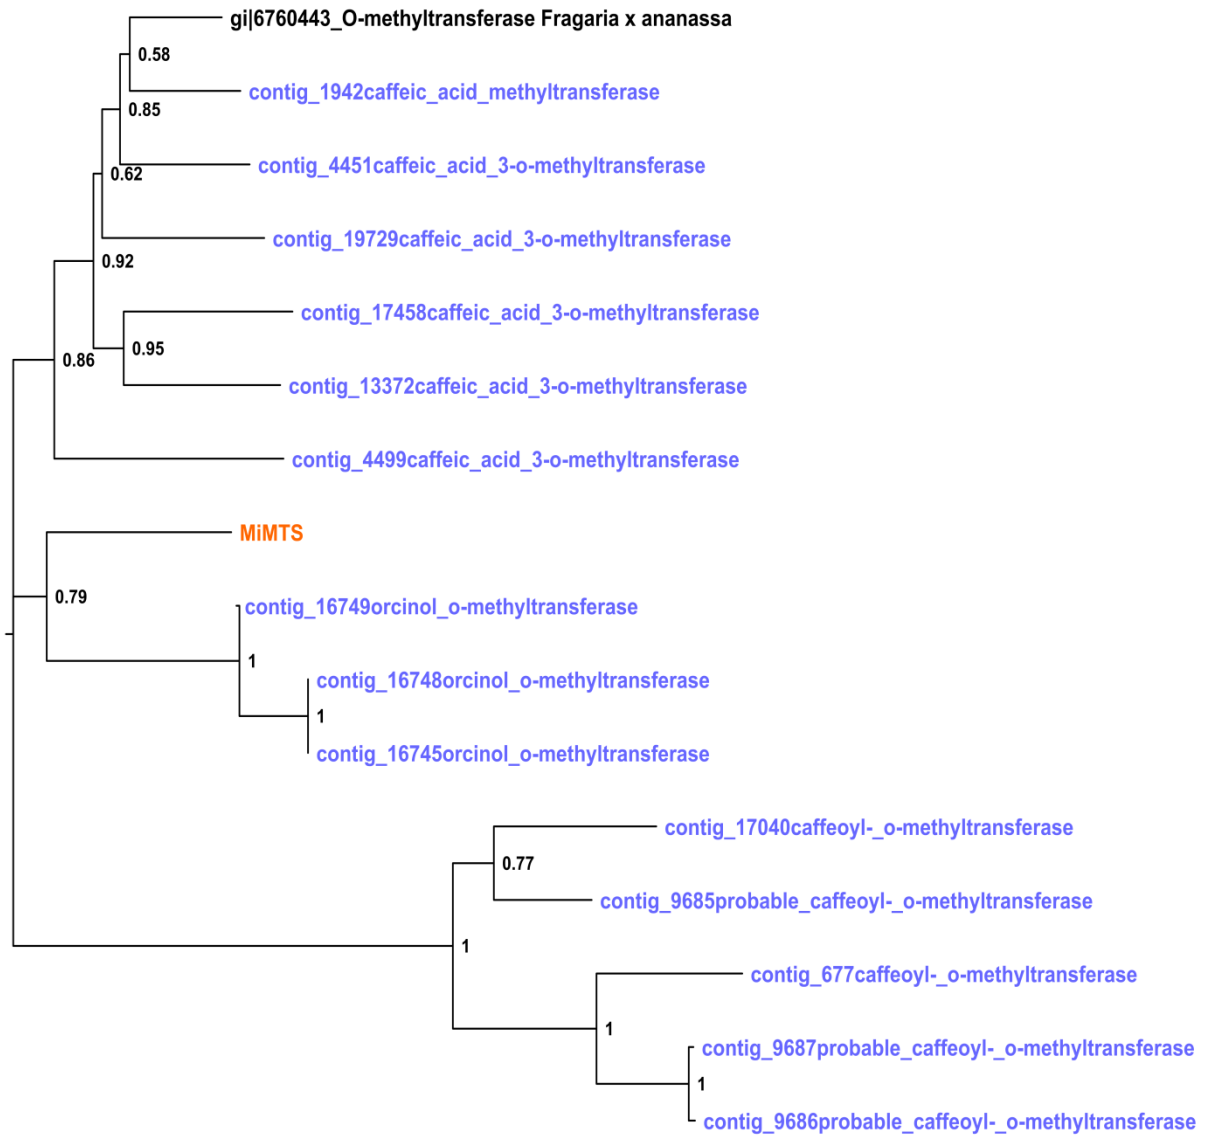



**Supplementary Figure SF5:** Phylogenetic analysis by neighbor-joining of proteins encoded by *9-lipoxygenase* (KX090178) involved in the biosynthesis of aroma volatiles from *Mangifera indica* (orange color) and other contigs representing *lipoxygenases* from present study (blue color) along with the other plant *9* and *13* *lipoxygenases* (black color) from *Vitis vinifera\_9LOX* (XP\_010659859), *Malus domestica\_9LOX* (NP\_001281030), *Prunus mume\_9LOX* (XP\_008246456), *Glycine max\_9LOX* (XP\_003521704), *Solanum tuberosum\_9LOX* (NP\_001274916), *Nicotiana tabacum\_9LOX* (XP\_016433823), *Dimocarpus longan\_9LOX* (ANF89411), *Corylus avellana\_9LOX* (CAD10740), *Litchi chinensis\_9LOX* (AEQ30071), *Populus euphratica\_9LOX* (XP\_011023610), *Eucalyptus grandis\_9LOX* (XP\_010025195), *Jatropha curcas\_9LOX* (XP\_012089053), *Ricinus communis\_9LOX* (XP\_002512386), *Solanum lycopersicum\_9LOX* (XP\_004244890), *Sesamum indicum\_9LOX* (XP\_011087404), *Nelumbo nucifera\_9LOX* (XP\_010256003), *Malus domestica\_13LOX* (NP\_001280985), *Prunus mume\_13LOX* (XP\_008228181), *Medicago truncatula\_13LOX* (XP\_003627308), *Solanum tuberosum\_13LOX* (NP\_001275115), *Glycine soja\_13LOX* (KHN39622), *Fragaria vesca\_13LOX* (XP\_004303702), *Morus notabilis\_13LOX* (XP\_010086794), *Eucalyptus grandis\_13LOX* (XP\_010033729), *Populus euphratica\_13LOX* (XP\_011035732), *Nelumbo nucifera\_13LOX* (XP\_010273845), *Capsicum annuum\_13LOX* (NP\_001311748), *Nicotiana tabacum\_13LOX* (XP\_016495606), *Citrus sinensis\_13LOX* (XP\_006465905), *Solanum lycopersicum\_13LOX* (AAB65767) and *Glycine max\_13LOX* (XP\_014624448).

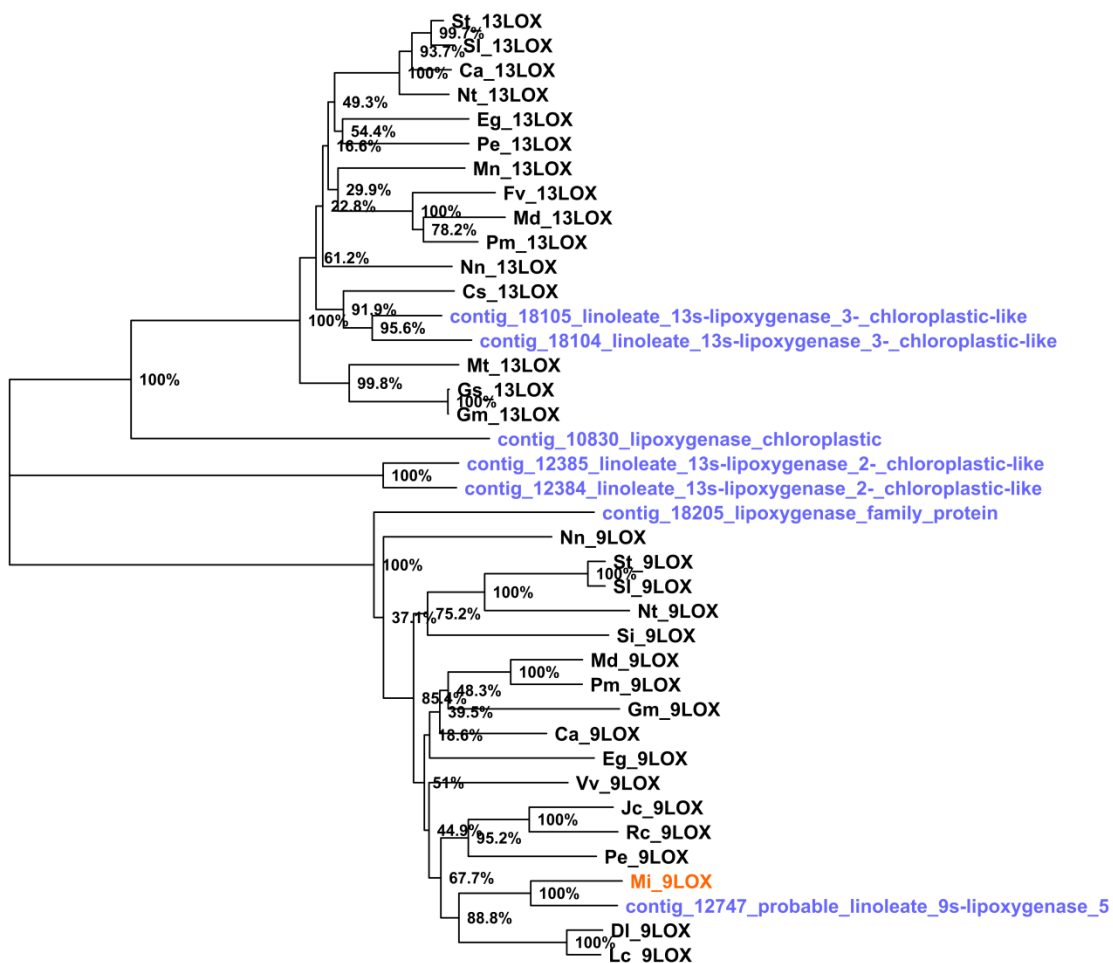

**Supplementary Figure SF6:** Phylogenetic analysis by neighbor-joining of proteins encoded by *epoxide hydrolase 2* (KX090179) involved in the biosynthesis of aroma volatile lactones from *Mangifera indica* (orange color) and other contigs representing *epoxide hydrolases* from the present study (blue color) along with the other plant *epoxide hydrolases* (black color) from *Nicotiana benthamiana\_EH1.2* (ACE82566), *Nicotiana benthamiana\_EH1.1* (ACE82565), *Phaseolus vulgaris\_EH* (AKJ75509), *Glycine max\_EH* (CAA55294), *Medicago truncatula\_EH* (XP\_003626202), *Glycine soja\_EH* (KHN43314), *Vigna radiata\_EH* (AIJ27456), *Brassica napus\_EH* (NP\_001302895), *Citrus sinensis\_EH2* (XP\_006489040), *Prunus mume\_EH2* (XP\_016647751), *Cicer arietinum\_EH2* (XP\_004508197), *Fragaria vesca\_EH2* (XP\_004290776), *Cajanus cajan\_EH2* (KYP58120), *Cucumis sativus\_EH2* (XP\_004134492), *Solanum lycopersicum\_EH2* (XP\_004252913) and *Morus notabilis\_EH2* (XP\_010105136).

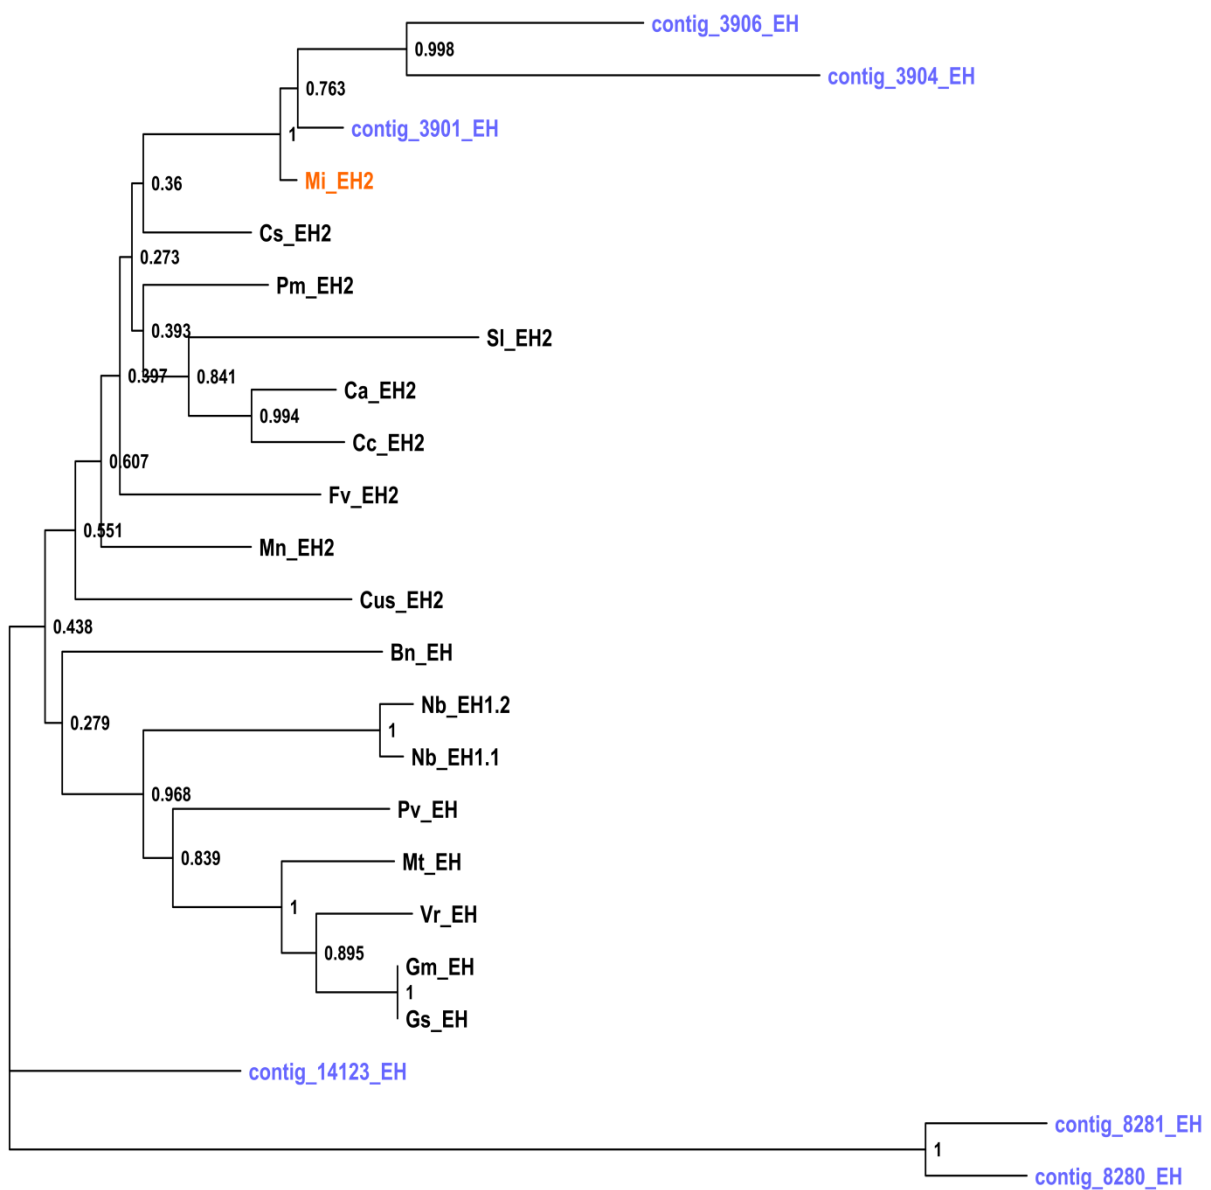



**Supplementary Figure SF8:** Heatmap representing differential expression of various contigs coding for 20 different inhibitors. Description for group 1-20 as follows, 1: alpha-amylase inhibitor, 2: androgen induced inhibitor of proliferation pds5, 3: apoptosis inhibitor, 4: bax inhibitor, 5: bifunctional inhibitor of lipid-transfer protein seed storage, 6: cell wall and vascular inhibitor of beta-fructosidase, 7: kinase inhibitor, 8: cysteine proteinase inhibitor, 9: trypsin inhibitor, 10: guanosine nucleotide diphosphate dissociation inhibitor, 11: macrophage migration inhibitory factor, 12: nf-kappa-b inhibitor, 13: pectinesterase inhibitor, 14: polygalacturonase inhibiting protein, 15: phosphoprotein phosphatase inhibitors, 16: plasminogen activator inhibitor 1 rna-binding, 17: proteasome inhibitor, 18: protein reversion to ethylene sensitivity, 19: protein transport inhibitor and 20: rho gdp-dissociation inhibitor.

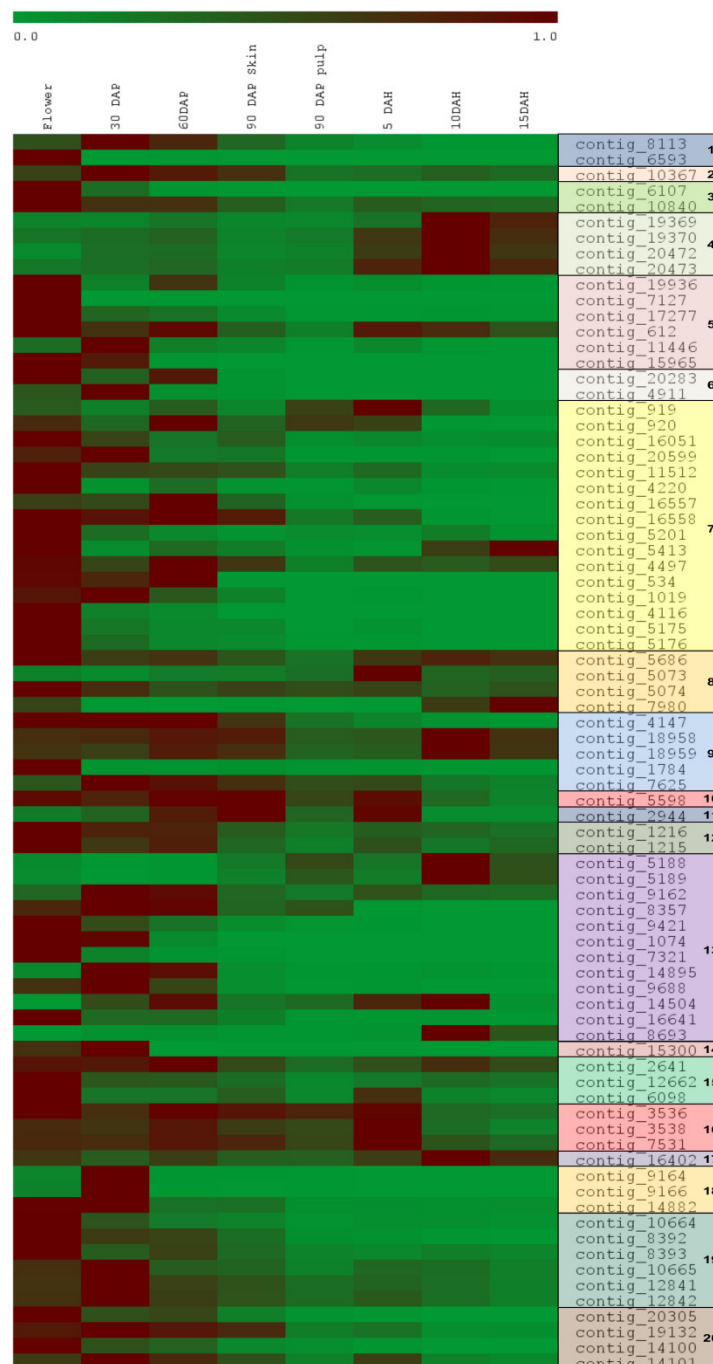

**Supplementary Figure SF9:** Terpene biosynthesis pathway from Alphonso mango

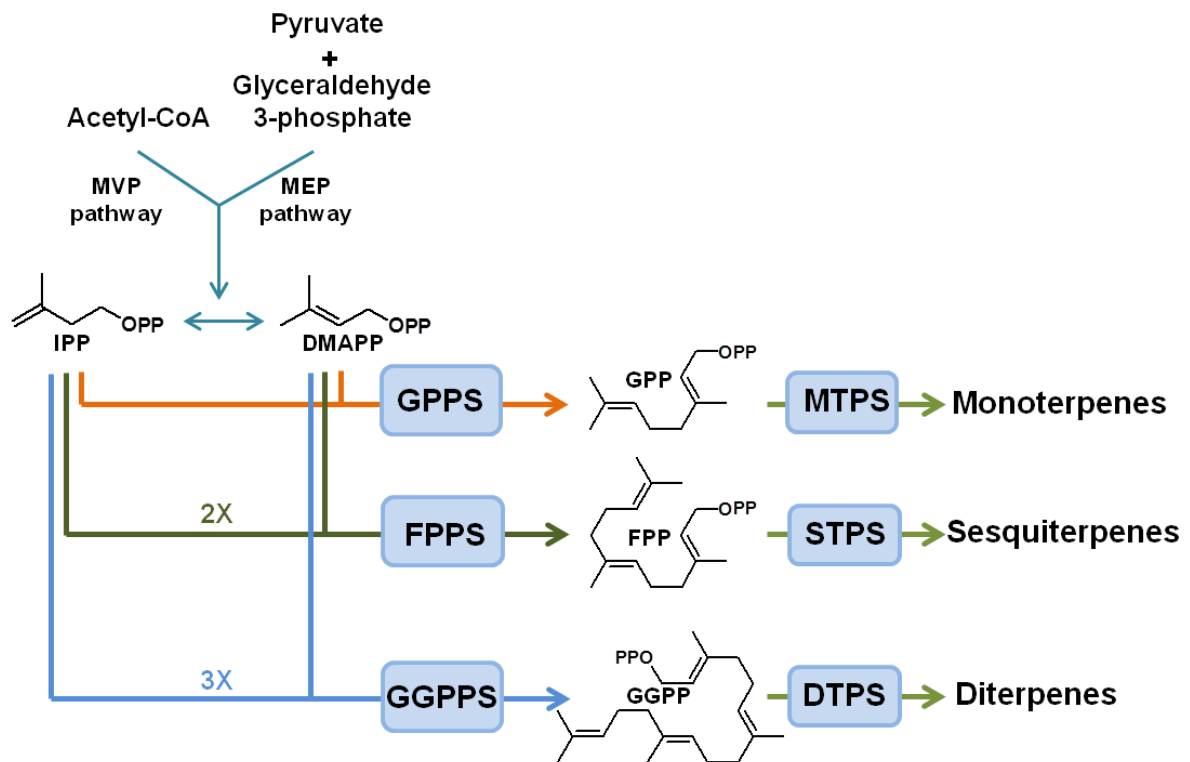

Supplement: 41598_2017_8499_MOESM1_ESM.pdf [file 41598_2017_8499_MOESM1_ESM.pdf]
